# Supplementary material for: Multi-year comparisons of ground-based and space-borne FourierTransform Spectrometers in the high Arctic between 2006 and 2013
Source: Copernicus journal article supplement (doi:10.5194/amt-2016-272), 2016-09-19
Supplement: Supplementary file [file amt-2016-272-AC2-supplement.pdf]

# **Multi-year comparisons of ground-based and space-borne Fourier Transform Spectrometers in the high Arctic between 2006 and 2013**

**Debora Griffin et al.**

*Correspondence to:* Kaley A. Walker  
(kaley.walker@utoronto.ca)

This document contains four supplementary figures that show correlation plots of the partial column comparison between ACE-FTS and the ground-based FTSs, PARIS-IR and the Bruker 125HR.

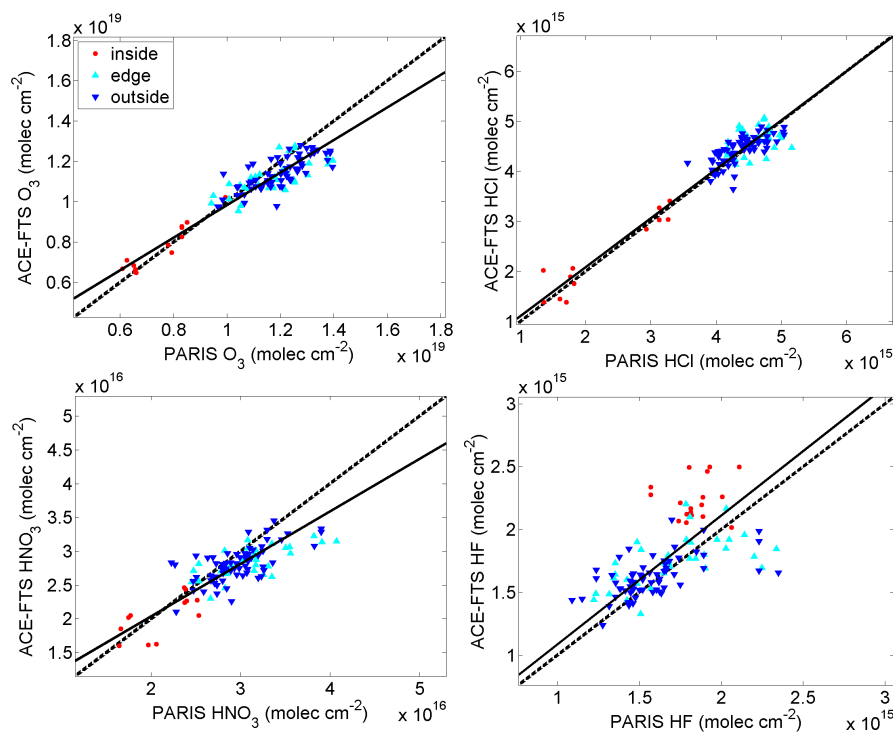

**Figure S1.** PARIS-IR partial columns versus ACE-FTS partial columns for each of the stratospheric trace gases used in this study, showing the correlation after smoothing has been applied to the ACE-FTS profiles. Measurements taken inside, near the edge and outside the polar vortex are shown as red dots, cyan triangles, and blue triangles, respectively. The line of best fit is shown as a black line. The dashed black line represents the 1-to-1 line as a reference. Slopes and correlation coefficients are given in Table 4.

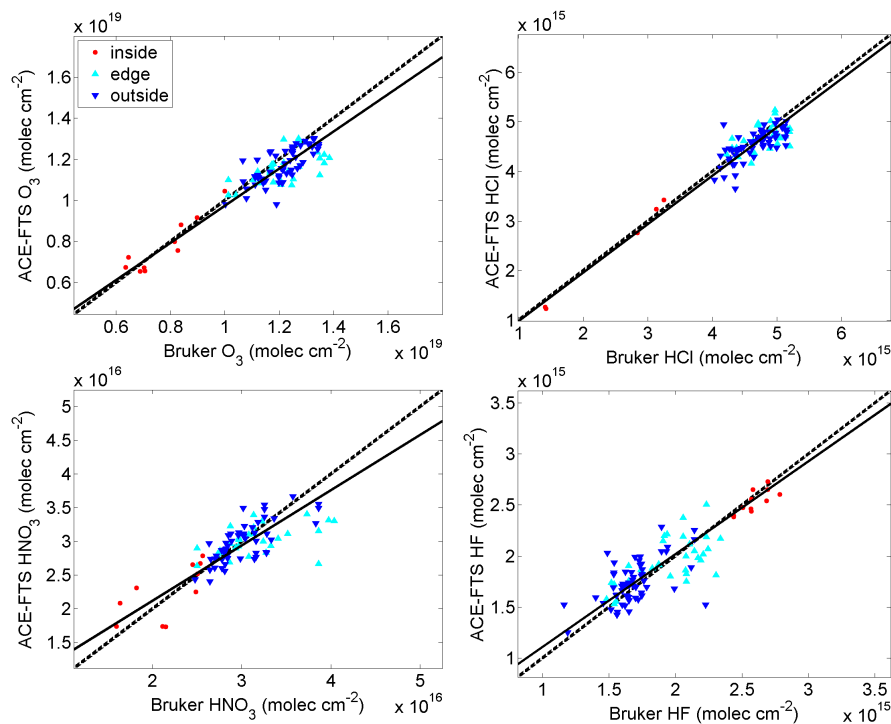

**Figure S2.** Same as Fig. S1, but for the Bruker 125HR partial columns versus smoothed ACE-FTS partial columns. Slopes and correlation coefficients are given in Table 5.

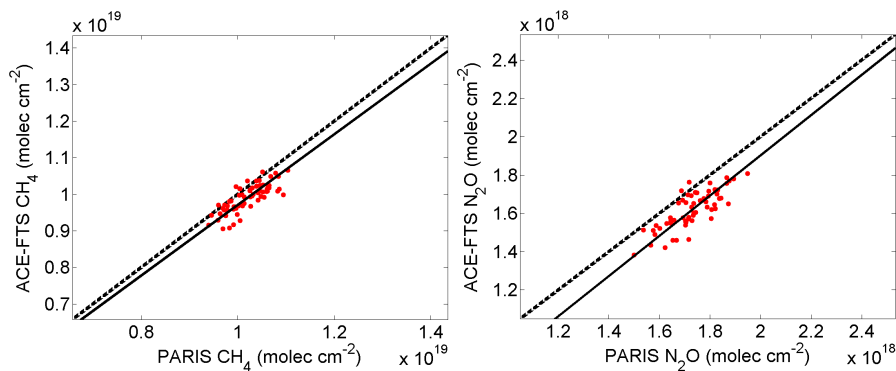

**Figure S3.** PARIS-IR partial columns versus ACE-FTS partial columns (red dots) for each of the tropospheric trace gases used in this study, showing the correlation after smoothing has been applied to the ACE-FTS profiles. The line of best fit is shown as a black line. The dashed black line represents the 1-to-1 line as a reference. Slopes and correlation coefficients are given in Table 6.

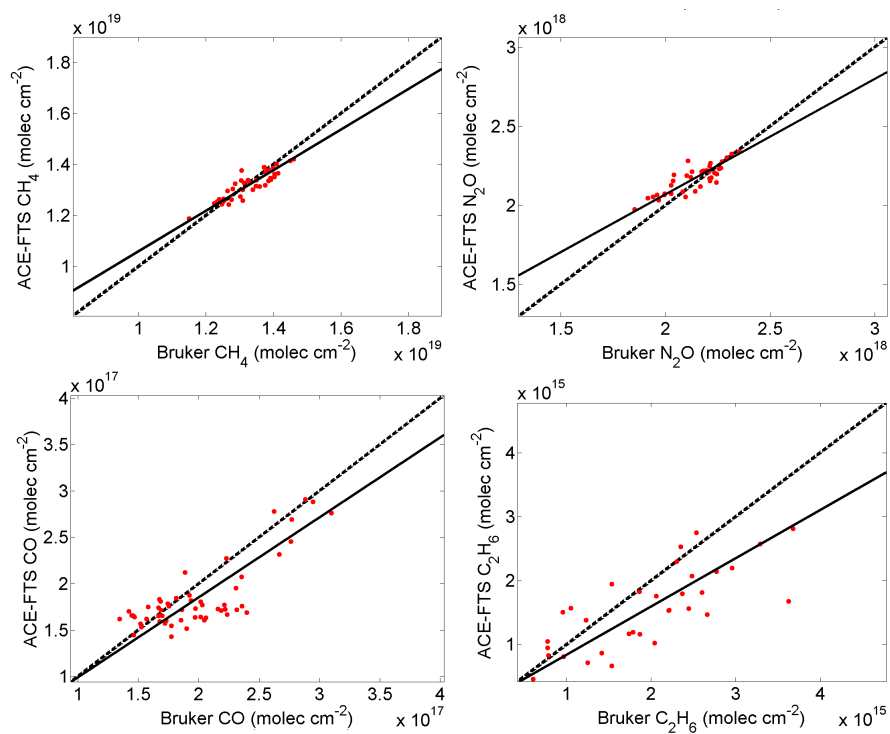

**Figure S4.** Same as Fig. S3, but for the Bruker 125HR partial columns versus smoothed ACE-FTS partial columns. Slopes and correlation coefficients are given in Table 7.
